# Supplementary material for: RNA–DNA hybrid nano-materials for highly efficient and long lasting RNA interference effect
Source: Royal Society of Chemistry journal article supplement (doi:10.1039/d2ra06249f), 2023-01-01
Supplement: d2ra06249f1.pdf [file d2ra06249f1.pdf]

## Supplementary Information

# RNA-DNA Hybrid Nano-materials for Highly Efficient and Long Lasting RNA Interference effect

Joung Sug Kim<sup>1</sup>, Junghyun Park<sup>1</sup>, Jang Hyeon Choi<sup>1</sup>, Seungjae Kang<sup>1</sup>, and Nokyoung Park<sup>1,\*</sup>

<sup>1</sup>Department of Chemistry and The Natural Science Research Institute, Myongji University, 116  
Myongji-Ro, Yongin, Gyeonggi-do, Republic of Korea

**Corresponding author:** Nokyoung Park

**E-mail:** [pospnk@mju.ac.kr](mailto:pospnk@mju.ac.kr)

**KEYWORDS.** RNA interference, RNA-DNA hybrid nanomaterial, DNA hydrogel, GFP  
fluorescence, RNAi-based therapy

Table S1. Oligonucleotide sequences for Ri-Dgel

| Oligo name     | Sequences                                                                          |
|----------------|------------------------------------------------------------------------------------|
| EGFP-X01       | 5'- <u>ACGGCAAGCUGACCCUGAAGUUCAUCUCAGATCCGTACCTACTCG</u>                           |
| BamHI-X02      | 5'- /5Phos/GATCCGAGTAGGTACGGATCTGCGTATTGCGAACGACTCG                                |
| BamHI-X03      | 5'- /5Phos/GATCCGAGTCGTTTCGCAATACGGCTGTACGTATGGTCTCG                               |
| EGFP-BamHI-X04 | 5'-<br>/5Phos/GATCCGAGACCATACGTACAGC <u>AGAUGAACUUCAGGGUCAGCUUGC</u><br><u>CGU</u> |
| EGFP-X01-rev   | 5'- <u>CGAGTAGGTACGGATCTGAGAUGAACUUCAGGGUCAGCUUGCCGU</u>                           |
| EGFP-R01       | 5'- <u>ACGGCAAGCUGACCCUGAAGUUCAUCU</u>                                             |
| EGFP-R04       | 5'- <u>AGAUGAACUUCAGGGUCAGCUUGCCGU</u>                                             |

\*Underlines: ribonucleic acid

Table S2. Primer sequences for RT-qPCR of siRNA and GFP mRNA

| Primer name      | Primer sequences                                                | Purpose                     |
|------------------|-----------------------------------------------------------------|-----------------------------|
| RT-GFP-AS2       | 5'-<br>GTCGTATCCAGTGCAGGGTCCGAGGTATTCGCACTGGATACGACAC<br>GGCAAG | siRNA<br>quantificati<br>on |
| GFP-AS2          | 5'- GCGAGATGAACTTCAGGGTCAG                                      |                             |
| RT_RNU6          | 5'-<br>GTCGTATCCAGTGCAGGGTCCGAGGTATTCGCACTGGATACGACAT<br>CGTTCC |                             |
| RNU6-F           | 5'- GGTGCTCGCTTCGGCAGCACA                                       |                             |
| Universal primer | 5'- GTGCAGGGTCCGAGGT                                            |                             |
| EGFP_92F         | 5'- GGCCACAAGTTCAGCGTGTC                                        | mRNA<br>quantificati<br>on  |
| EGFP_217R        | 5'- TGAAGCACTGCACGCCGTAG                                        |                             |
| GAPDH_F          | 5'- GATGCCCCCATGTTTGTGA                                         |                             |
| GAPDH_R          | 5'- TTTGGCTAGAGGAGCCAAGCA                                       |                             |

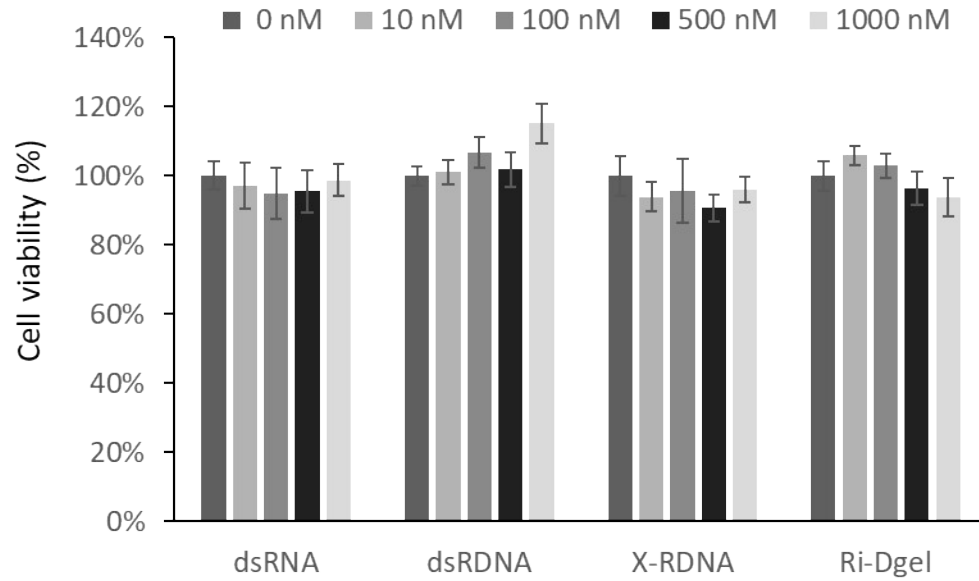

**Figure S1. Viability test of dsRNA treated cells.** MDCK/GFP cells were treated with various concentrations of each format of dsRNA and the viability of the cells was measured with CellTiter-Glo Luminescent Cell Viability Assay. Error bars refer to standard deviations from three replicates.
